# Supplementary material for: Phosphine Sulfide-Based Bipolar Host Materials for Blue Phosphorescent Organic Light-Emitting Diodes
Source: MDPI journal article supplement (doi:10.3390/molecules26134079), 2021-07-03
Supplement: s1 [file s1]

## **Phosphine Sulfide Based Bipolar Host Materials for Blue Phosphorescent Organic Light-Emitting Diodes**

Gaozhan Xie<sup>1</sup>, Jiangchao Wang<sup>1</sup>, Yang Cao<sup>1</sup>, Xudong Xue<sup>1</sup>, Xiao Zhang<sup>1</sup>, Chang Liu<sup>1</sup>,  
Huanhuan Li<sup>1,\*</sup>, Ye Tao<sup>1,\*</sup>, and Runfeng Chen<sup>1</sup>

<sup>1</sup>State Key Laboratory of Organic Electronics and Information Displays & Institute of Advanced Materials (IAM), Jiangsu National Synergistic Innovation Center for Advanced Materials (SICAM), Nanjing University of Posts & Telecommunications, 9 Wenyuan Road, Nanjing 210023, China

\*Correspondence: iamhli@njupt.edu.cn and iamytao@njupt.edu.cn

### **Contents**

|                                                  |    |
|--------------------------------------------------|----|
| 1. NMR Spectra.....                              | S2 |
| 2. Mass Spectra .....                            | S5 |
| 3. Phosphorescence Spectra .....                 | S6 |
| 4. Absorption and Photoluminescence Spectra..... | S6 |

## 1. NMR Spectra

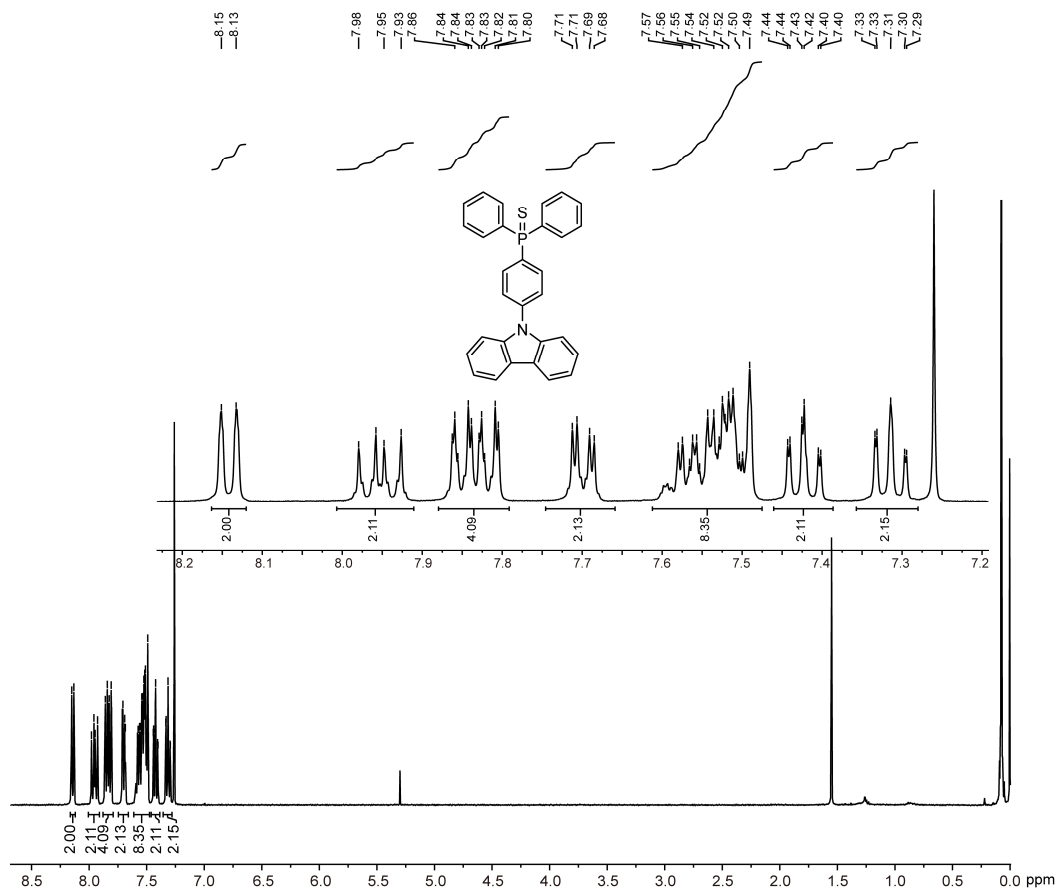

Figure S1.  $^1\text{H}$  NMR spectrum of CzPhPS in  $\text{CDCl}_3$ .

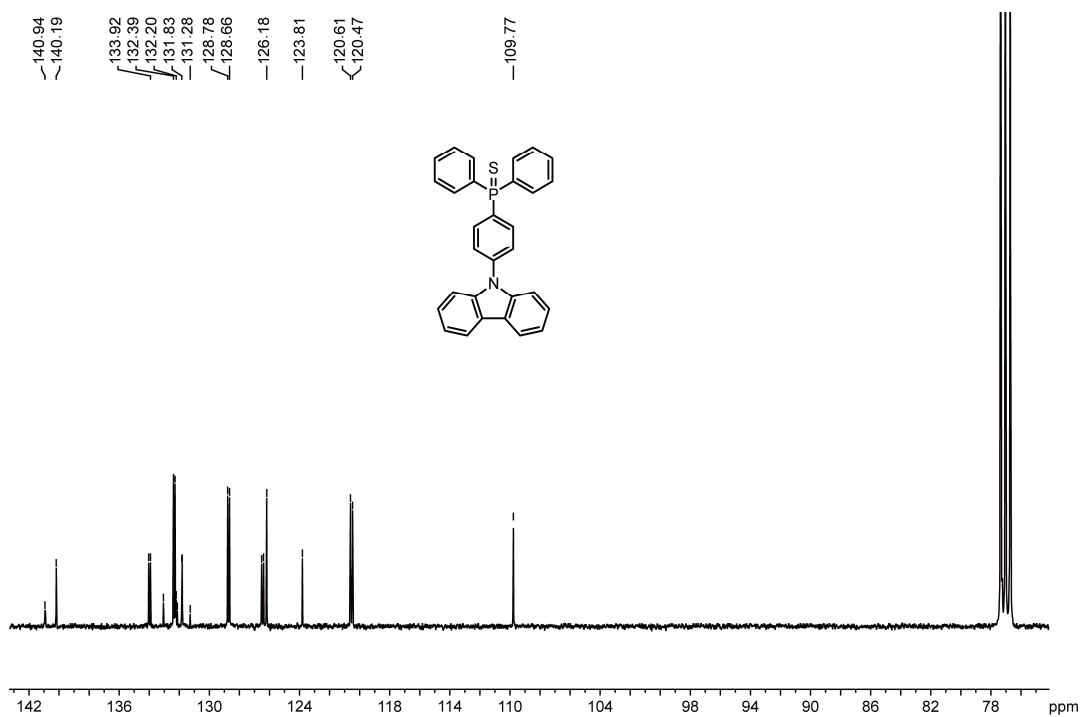

Figure S2.  $^{13}\text{C}$  NMR spectrum of CzPhPS in  $\text{CDCl}_3$ .

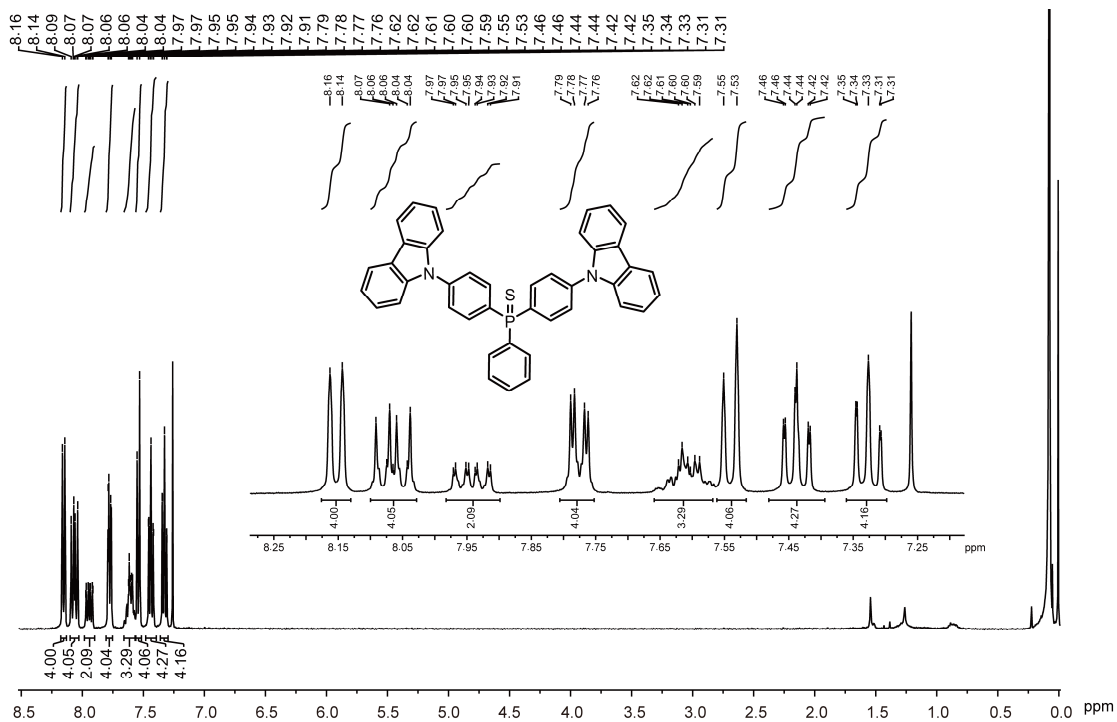

**Figure S3.** <sup>1</sup>H NMR spectrum of DCzPhPS in CDCl<sub>3</sub>.

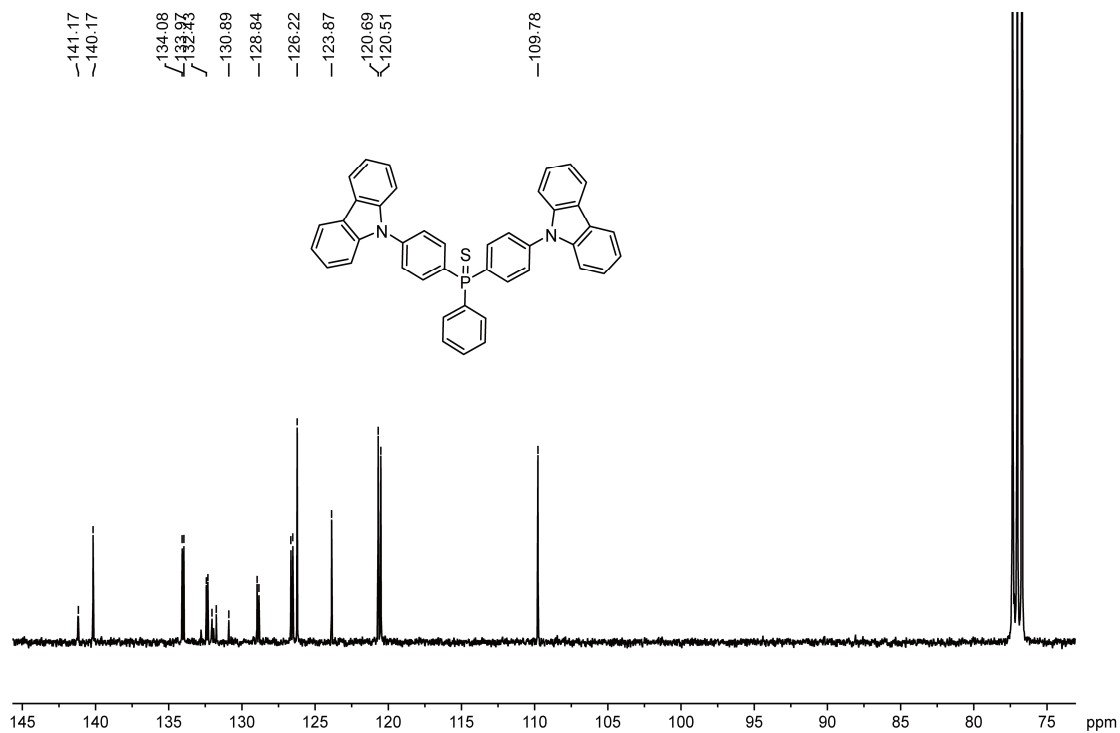

**Figure S4.** <sup>13</sup>C NMR spectrum of DCzPhPS in CDCl<sub>3</sub>.

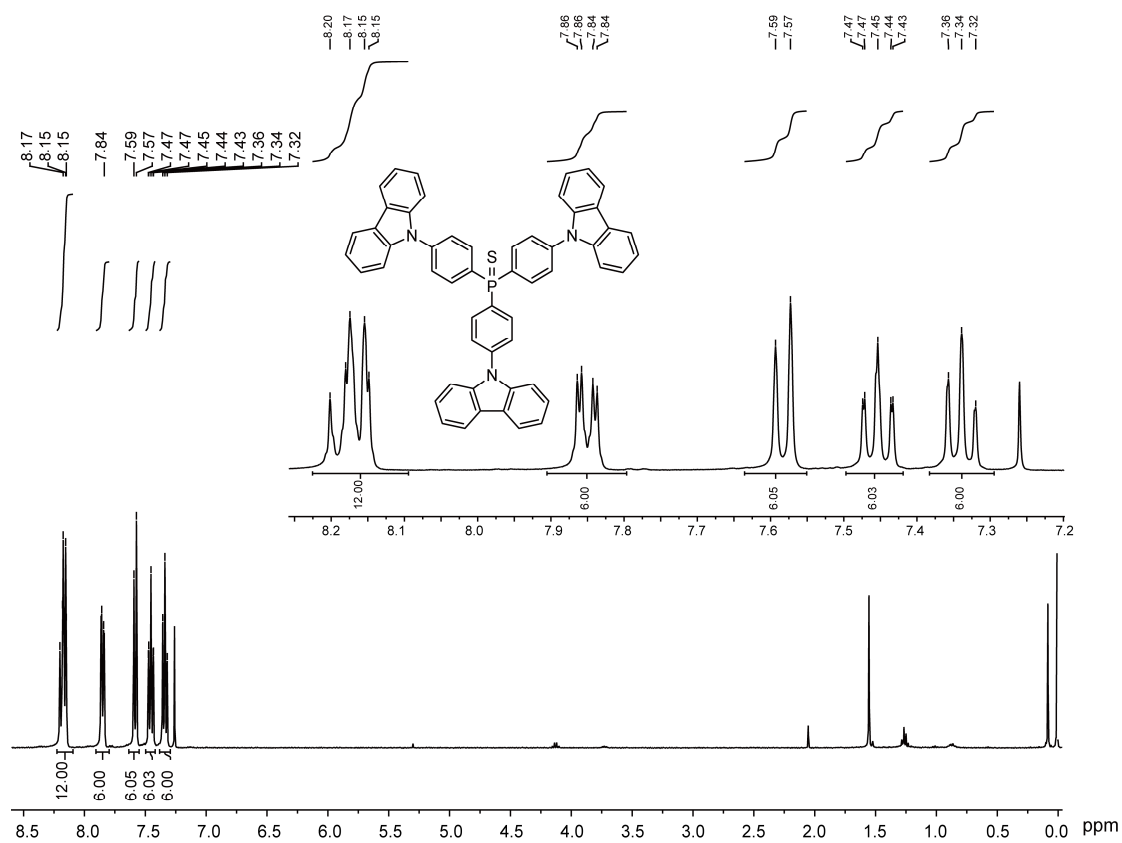

**Figure S5.** <sup>1</sup>H NMR spectrum of TCzPhPS in CDCl<sub>3</sub>.

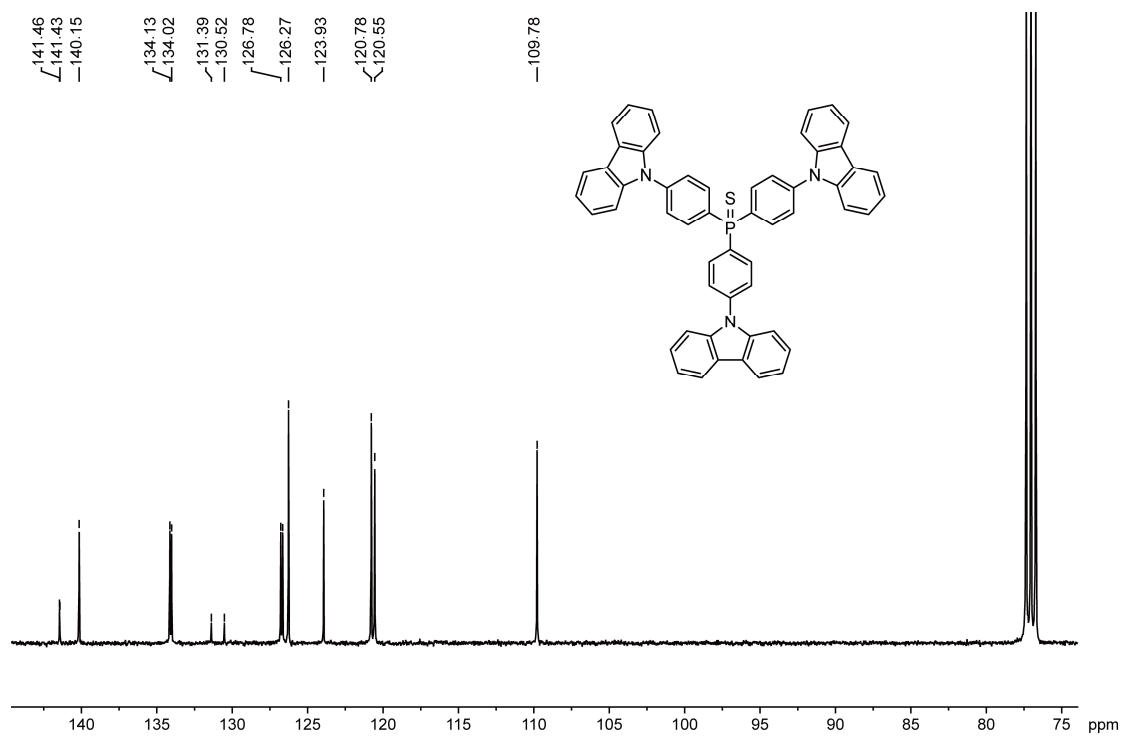

**Figure S6.** <sup>13</sup>C NMR spectrum of TCzPhPS in CDCl<sub>3</sub>.

## 2. Mass Spectra

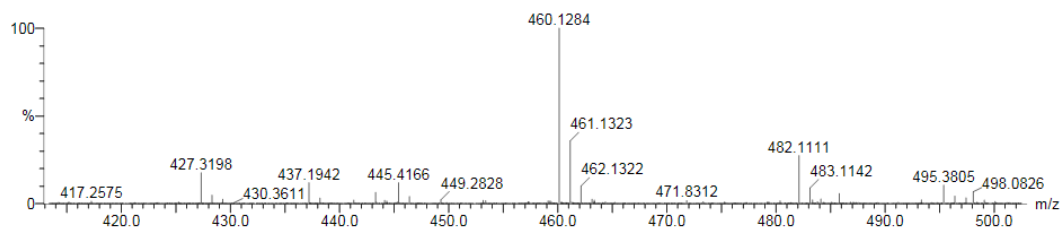

Figure S7. HRMS spectrum of CzPhPS.

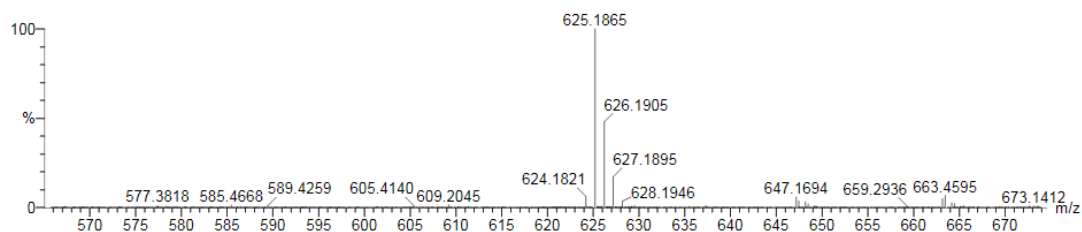

Figure S8. HRMS spectrum of DCzPhPS.

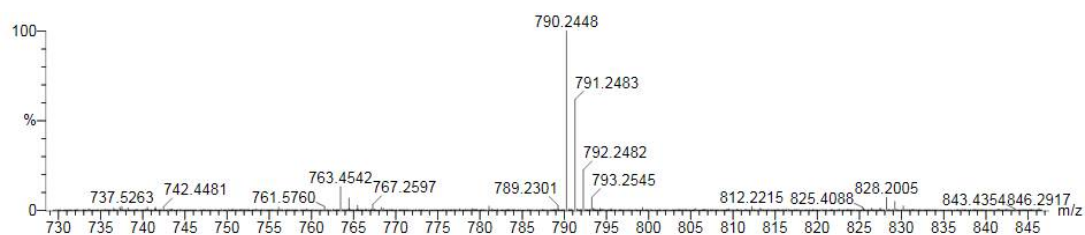

Figure S9. HRMS spectrum of TCzPhPS.

### 3. Phosphorescence Spectra

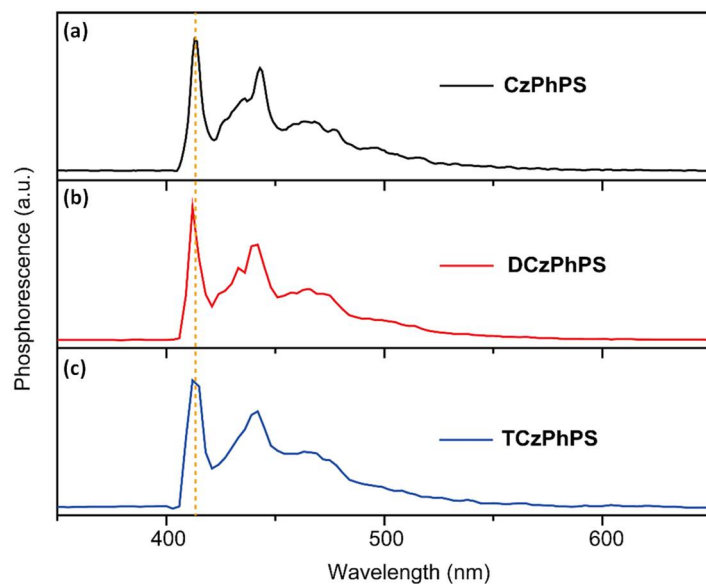

**Figure S10.** Phosphorescence spectra of (a) CzPhPS, (b) DCzPhPS, and (c) TCzPhPS measured at 77 K in THF with a delay time of 20 ms.

### 4. Absorption and Photoluminescence Spectra

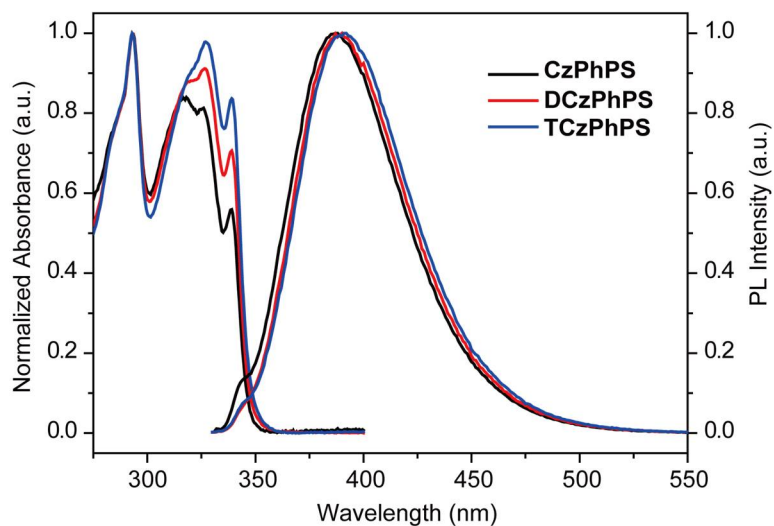

**Figure S11.** Absorption and PL spectra of **CzPhPS**, **DCzPhPS**, and **TCzPhPS** in dichloromethane solution.
